# Supplementary material
Source: PubMed Central journal article supplement (PMC3300054)
Supplement: tjp0590-0163-SD1.pdf [file tjp0590-0163-SD1.pdf]

## Supplementary Figure 1

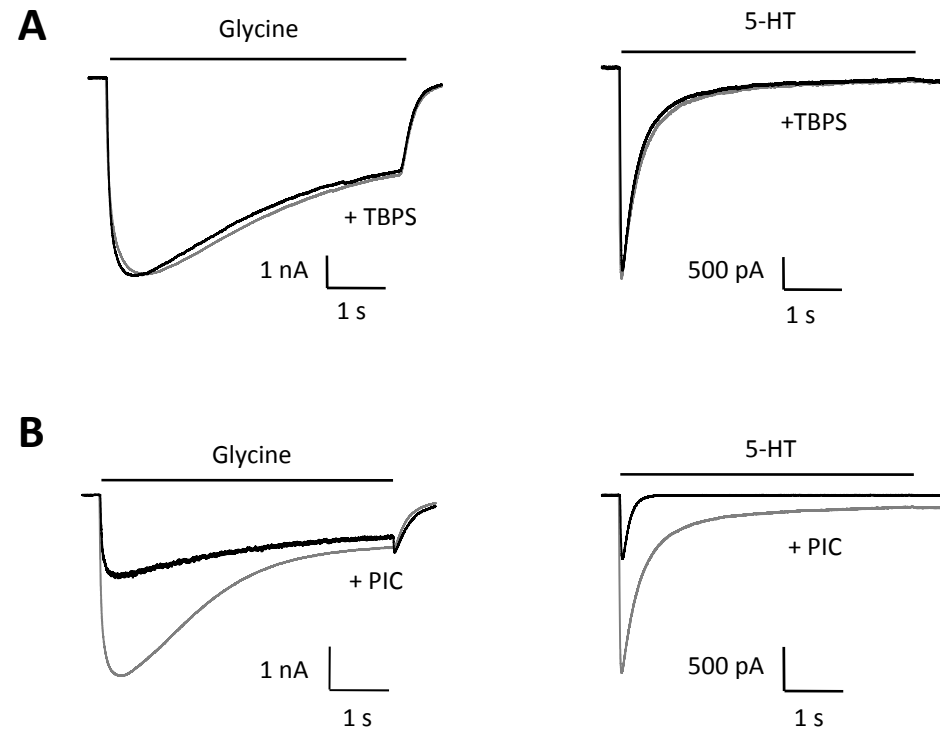

**Supplementary Figure 1.** The effects of TBPS and picrotoxin on 5-HT<sub>3A</sub> and glycine  $\alpha$ 2 receptors. A. TBPS (10 mM) applied at a concentration that caused near maximal block of GABA<sub>A</sub>Rs (Fig. 1) had no effect on currents mediated by either  $\alpha$ 2 glycine or 5-HT<sub>3A</sub> receptors expressed in HEK293 cells ( $n \geq 3$ ). B. Picrotoxin (100  $\mu$ M) inhibited currents evoked by 5-HT (100  $\mu$ M) and glycine (100  $\mu$ M) recorded from HEK293 cells expressing 5-HT<sub>3A</sub> or glycine  $\alpha$ 2 receptors, respectively.

## Supplemental Figure 2

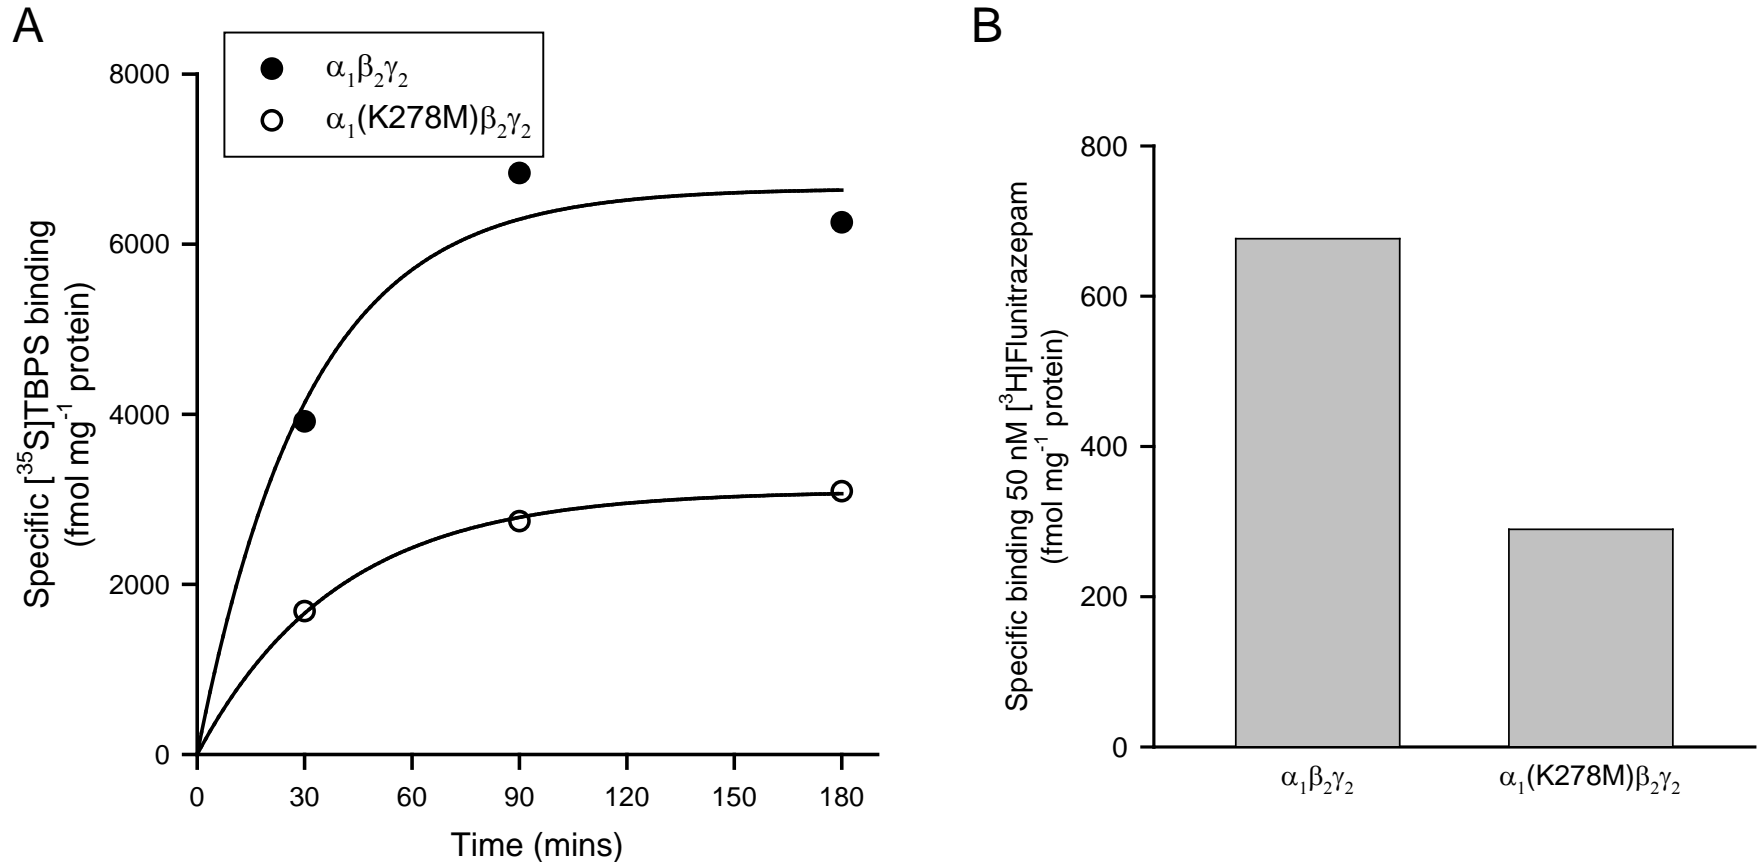

Properties of TBPS and benzodiazepine binding to wild-type and mutant GABA<sub>A</sub> receptors. **A.** Time course of [<sup>35</sup>S]TBPS binding to  $\alpha_1\beta_2\gamma_2$  or  $\alpha_1(\text{K278M})\beta_2\gamma_2$  GABA<sub>A</sub> receptors. HEK membranes containing either  $\alpha_1\beta_2\gamma_2$  or  $\alpha_1(\text{K278M})\beta_2\gamma_2$  GABA<sub>A</sub> receptors were incubated with 30 nM [<sup>35</sup>S]TBPS for 30, 90 or 180 mins. The data were fitted with an exponential function to determine the time course of obtaining equilibrium binding. The time constants for [<sup>35</sup>S]TBPS binding to  $\alpha_1\beta_2\gamma_2$  or  $\alpha_1(\text{K278M})\beta_2\gamma_2$  GABA<sub>A</sub> receptors were 31 and 39 min respectively. Binding to mutant receptors at equilibrium was 47% of binding to wild type receptors (3098 and 6656 fmol mg<sup>-1</sup> protein respectively). **B.** The K278M mutation reduced benzodiazepine binding. HEK membranes containing wild-type or mutant receptors were incubated in a saturating concentration (50 nM) of [<sup>3</sup>H]Flunitrazepam for 90 mins. Specific [<sup>3</sup>H]flunitrazepam binding to wild-type and mutant receptors was 677 and 290 fmol mg<sup>-1</sup> protein respectively.

## Supplemental Figure 3

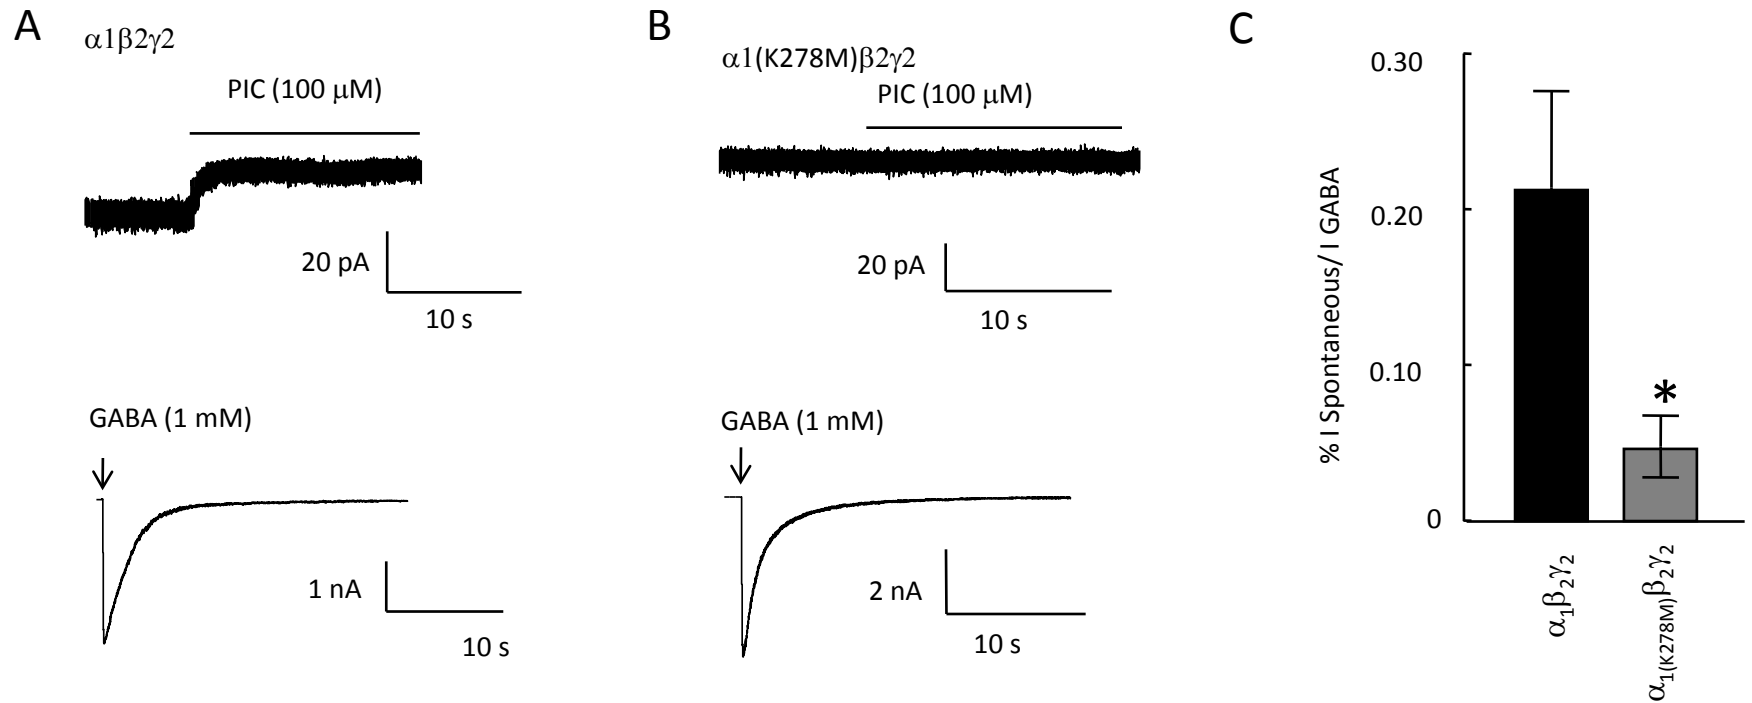

The K289M epilepsy mutation reduces spontaneous, GABA-independent gating when transiently expressed in HEK293 cells. **A.** Spontaneous leak currents recorded from recombinant  $\alpha 1\beta 2\gamma 2$  receptors are inhibited by picotoxin (100  $\mu\text{M}$ ) in the absence of GABA (top panel). GABA (1 mM) evoked a typical whole-cell response in the same experiment, demonstrating the presence of functional GABA<sub>A</sub> receptors. **B.** Mutant  $\alpha 1(\text{K278M})\beta 2\gamma 2$  receptors have diminished spontaneous gating, as evident by the lack of current blockade in the presence of picotoxin (100  $\mu\text{M}$ ). Mutant receptors also exhibit a typical whole cell response to GABA (1 mM). **C.** Graphical summary of spontaneous leak current recorded from different GABA<sub>A</sub> receptor subtypes. Spontaneous current is expressed as a percentage of whole cell current evoked by GABA. Mutant subunits containing the K289M substitution caused a reduction in spontaneous current compared to wild type receptors. Data are represented as mean  $\pm$  S.E.M. \*p < 0.05 compared to  $\alpha 1\beta 2\gamma 2$  by Student's *t*-test.
